# Supplementary material for: Phenotypic Characterization of Mycoplasma synoviae Induced Changes in the Metabolic and Sensitivity Profile of In Vitro Infected Chicken Chondrocytes
Source: PubMed Central journal article supplement (PMC4160629; doi:10.1155/2014/613730), 2014-08-26
Supplement: 613730.f1.pdf [file 613730.f1.pdf]

691 **Appendix:**

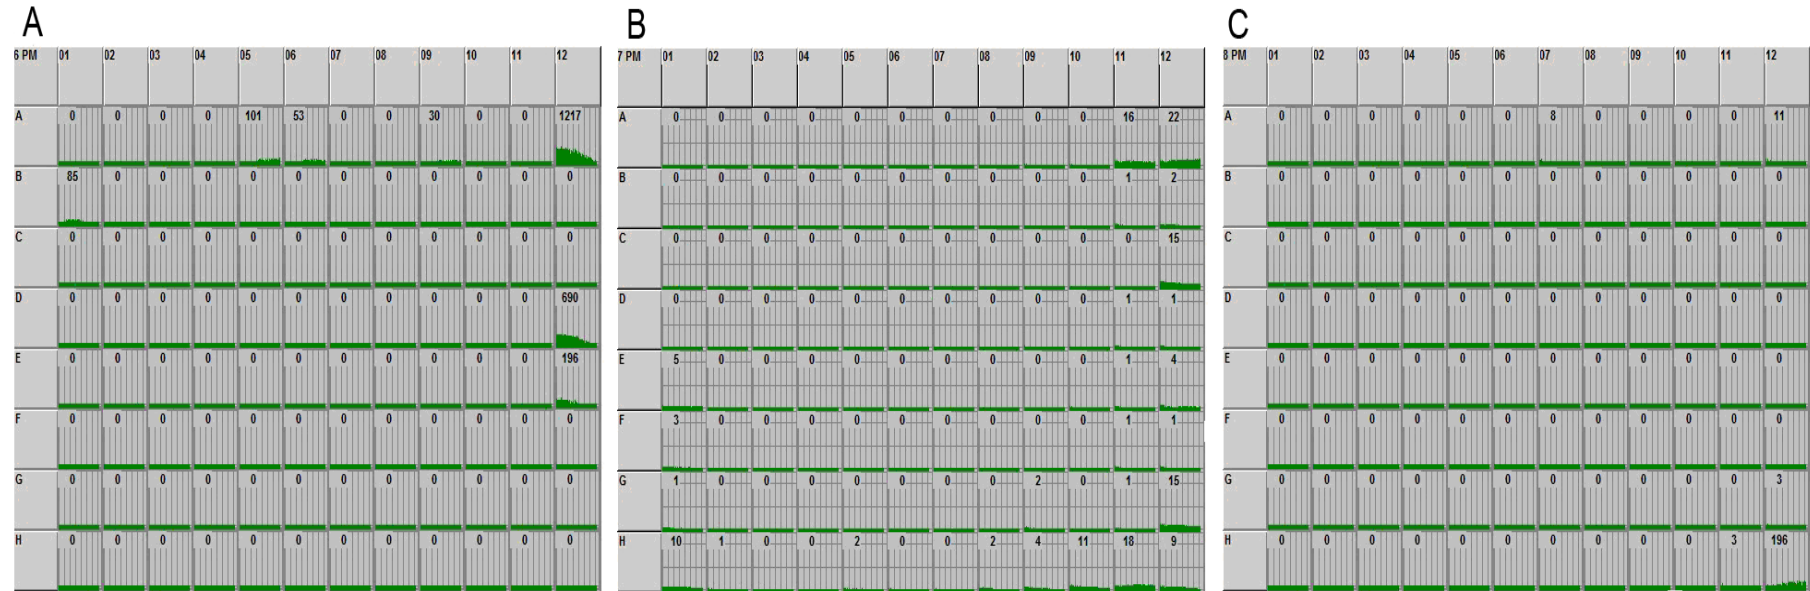

692

693 **Supplementary Fig. A1: Respiratory activity of control *Mycoplasma synoviae* WVU 1853 strain, which was used for CCH infection, on**  
 694 **PMMs 6-8. *M. synoviae* were plated in equal concentration as in the CCH infection experiment and incubated in the OmniLog incubator/reader**  
 695 **together with plates containing infected and non-infected CCH. An equal amount of MB dye was added to all plates and the respiratory activity**  
 696 **monitored as described for infected CCH. The absence of respiratory activity in this control experiment excludes bacterial influence on CCH**  
 697 **metabolism in the study.**
